# Supplementary material for: Overgrowth of the lower limb after treatment of developmental dysplasia of the hip: incidence and risk factors in 101 children with a mean follow-up of 15 years
Source: PubMed Central journal article supplement (PMC7144334; doi:10.1080/17453674.2019.1688485), 2019-11-12
Supplement: IORT_A_1688485_SM0874.pdf [file IORT_A_1688485_SM0874.pdf]

## Supplementary data

Appendix. Intraclass correlation coefficients calculated to evaluate intraobserver and interobserver reliability

| Parameters            | Intraobserver (95% CI) | Interobserver (95% CI) |
|-----------------------|------------------------|------------------------|
| FHHD                  | 0.998 (0.997–0.999)    | 0.996 (0.994–0.997)    |
| AI                    | 0.895 (0.783–0.950)    | 0.821 (0.731–0.881)    |
| CHDD                  | 0.961 (0.920–0.981)    | 0.915 (0.874–0.943)    |
| Femoral head diameter | 0.919 (0.830–0.961)    | 0.904 (0.799–0.955)    |

FHHD = femoral head height difference; AI = acetabular index; CHDD = center–head distance discrepancy; CI = confidence interval.

Table 3. Univariable analysis of risk factors for development of overgrowth of the affected limb in overall patients. Values are number of hips unless otherwise specified

| Risk factors                        | FHHD > 10 mm        |                        |                            |         | FHHD > 15 mm        |                        |                            |         |
|-------------------------------------|---------------------|------------------------|----------------------------|---------|---------------------|------------------------|----------------------------|---------|
|                                     | Overgrowth (n = 44) | No overgrowth (n = 57) | RR (95% CI)                | p-value | Overgrowth (n = 23) | No overgrowth (n = 78) | RR (95% CI)                | p-value |
| Age at reduction, months, mean (SD) | 18 (9)              | 17 (11)                | 1.0 (1.0–1.0)              | 0.8     | 19 (10)             | 17 (10)                | 1.0 (1.0–1.0)              | 0.7     |
| Male sex                            | 7                   | 3                      | 2.0 (0.8–5.2)              | 0.1     | 5                   | 5                      | 2.5 (1.2–5.3) <sup>a</sup> | 0.02    |
| Initial severity                    |                     |                        |                            |         |                     |                        |                            |         |
| Tönnis grade ≥ III                  | 12                  | 13                     | 1.1 (0.7–1.7)              | 0.7     | 6                   | 19                     | 1.1 (0.5–2.5)              | 0.8     |
| AI at reduction (°), mean (SD)      | 33 (6)              | 33 (6)                 | 1.0 (1.0–1.0)              | 0.7     | 32 (6)              | 34 (6)                 | 1.0 (0.9–1.0)              | 0.2     |
| Reduction method                    |                     |                        |                            |         |                     |                        |                            |         |
| Anterolateral OR                    | 30                  | 26                     | 1.5 (1.1–2.1) <sup>a</sup> | 0.03    | 18                  | 38                     | 2.9 (1.2–7.2) <sup>a</sup> | 0.02    |
| Osteotomy site                      |                     |                        |                            |         |                     |                        |                            |         |
| Femoral osteotomy                   | 21                  | 12                     | 1.8 (1.1–2.9) <sup>a</sup> | 0.003   | 13                  | 20                     | 2.7 (1.3–5.5) <sup>a</sup> | 0.007   |
| Pelvic osteotomy                    | 19                  | 22                     | 1.1 (0.8–1.6)              | 0.6     | 12                  | 29                     | 1.6 (0.8–3.3)              | 0.2     |
| Deformity of proximal femur         |                     |                        |                            |         |                     |                        |                            |         |
| Type II osteonecrosis               | 13                  | 16                     | 1.0 (0.7–1.5)              | 0.9     | 6                   | 23                     | 0.9 (0.4–2.0)              | 0.8     |
| Coxa magna                          | 16                  | 12                     | 1.4 (0.9–2.3)              | 0.07    | 12                  | 16                     | 2.8 (1.4–5.7) <sup>a</sup> | 0.003   |

<sup>a</sup> Statistically significant.

FHHD = femoral head height difference; RR = relative risk; CI = confidence interval; AI = acetabular index; OR = open reduction.

Table 5. Demographic and clinical characteristics of femoral osteotomy and non-femoral osteotomy groups. Values are number of hips unless otherwise specified

| Characteristics                      | Femoral osteotomy group (n = 33) | Non-femoral osteotomy group (n = 68) | p-value           |
|--------------------------------------|----------------------------------|--------------------------------------|-------------------|
| FHHD > 10 mm                         | 21                               | 23                                   | 0.01 <sup>b</sup> |
| FHHD > 15 mm                         | 13                               | 10                                   | 0.01 <sup>b</sup> |
| Age at reduction, month <sup>a</sup> | 19 (8)                           | 17 (11)                              | 0.3 <sup>c</sup>  |
| Female sex                           | 29                               | 62                                   | 0.7 <sup>c</sup>  |
| Tönnis grade ≥ III                   | 9                                | 14                                   | 0.5 <sup>b</sup>  |
| AI at reduction (°) <sup>a</sup>     | 34 (6)                           | 33 (6)                               | 0.7 <sup>c</sup>  |
| Anterolateral OR                     | 22                               | 34                                   | 0.1 <sup>b</sup>  |
| Pelvic osteotomy                     | 17                               | 24                                   | 0.1 <sup>b</sup>  |
| Type II osteonecrosis                | 10                               | 19                                   | 0.8 <sup>b</sup>  |
| Coxa magna                           | 14                               | 14                                   | 0.03 <sup>b</sup> |

<sup>a</sup> The values are given as the mean (SD).<sup>b</sup> Fisher's exact test.<sup>c</sup> Student's t-test.

FHHD = femoral head height difference; AI = acetabular index; OR = open reduction

Table 6. Comparison of the acetabular index (AI) and center–head distance discrepancy (CHDD) at the age of 3 years between the overgrowth and no-overgrowth groups in 42 hips that had not undergone femoral or pelvic osteotomies. Values are mean (SD)

| Radiographic parameters at age 3 years | Overgrowth (n = 13) | No overgrowth (n = 29) | p-value <sup>a</sup> |
|----------------------------------------|---------------------|------------------------|----------------------|
| FHHD > 10 mm                           |                     |                        |                      |
| AI (°)                                 | 27 (5)              | 25 (6)                 | 0.3                  |
| CHDD (%)                               | 10 (6)              | 6 (4)                  | 0.005                |
| FHHD > 15 mm                           |                     |                        |                      |
| AI (°)                                 | 25 (5)              | 26 (6)                 | 0.8                  |
| CHDD (%)                               | 10 (5)              | 7 (5)                  | 0.2                  |

<sup>a</sup> Mann-Whitney U-test.

FHHD = femoral head height difference.
